# Supplementary material for: Symptom Severity and Readiness to Quit Among Hospitalized Smokers With Mental Illness
Source: Atypon-hosted journal article supplement (doi:10.1176/appi.ps.201400181), 2015-04-01
Supplement: appi.ps.201400181.ds001.pdf [file appi.ps.201400181.ds001.pdf]

TABLE 1. Descriptive statistics and standardized  $\beta$  values and odds ratios from multivariate regression analyses predicting cigarette dependence, thoughts about abstinence, and stage of change from demographic variables and perceived psychological and physical symptoms

| Independent variables         | Descriptive Statistics |     |             | Cigarette Dependence<br>$\beta$ | Desire to quit<br>$\beta$ | Expectation of success<br>$\beta$ | Difficulty staying abstinent<br>$\beta$ | Contemplation <sup>1</sup> |           | Preparation <sup>1</sup> |           |
|-------------------------------|------------------------|-----|-------------|---------------------------------|---------------------------|-----------------------------------|-----------------------------------------|----------------------------|-----------|--------------------------|-----------|
|                               | N=956                  | %   | M $\pm$ SD  |                                 |                           |                                   |                                         | OR                         | 95% CI    | OR                       | 95% CI    |
| <b>Demographics</b>           |                        |     |             |                                 |                           |                                   |                                         |                            |           |                          |           |
| Age                           |                        |     | 39 $\pm$ 14 | .18 ***                         | .15 ***                   | .10 **                            | -.07 *                                  | 1.02**                     | 1.00–1.03 | 1.01                     | 1.00–1.03 |
| Female Gender                 | 465                    | 49% |             | -.04                            | .07 *                     | .03                               | .06                                     | 1.13***                    | 1.05–1.22 | 1.03                     | .95–1.12  |
| Non-Hispanic White Ethnicity  | 477                    | 48% |             | -.07 *                          | .01                       | .07                               | -.02                                    | 1.48*                      | 1.08–2.02 | 1.06                     | .74–1.53  |
| > High School Education       | 561                    | 59% |             | -.13 ***                        | -.02                      | -.05                              | -.01                                    | .88                        | .64–1.21  | .93                      | .64–1.35  |
| On a Psychiatric Pension      | 373                    | 39% |             | .12 ***                         | .01                       | -.02                              | .04                                     | .92                        | .66–1.28  | 1.21                     | .83–1.79  |
| Academic Hospital             | 231                    | 24% |             | -.01                            | -.05                      | -.08 *                            | -.02                                    | .96                        | .68–1.34  | 1.17                     | .79–1.72  |
| Cigarette Dependence          |                        |     | 5 $\pm$ 2   | –                               | .05                       | -.09 **                           | .11 ***                                 | 1.44                       | 1.00–2.08 | 1.39                     | .90–2.14  |
| <b>Mental Health Symptoms</b> |                        |     |             |                                 |                           |                                   |                                         |                            |           |                          |           |
| <b>BASIS–24</b>               |                        |     |             |                                 |                           |                                   |                                         |                            |           |                          |           |
| Depression/Functioning        |                        |     | 3 $\pm$ 1   | .09 **                          | .12 ***                   | -.07 *                            | .12 ***                                 | 1.23**                     | 1.06–1.43 | 1.30**                   | 1.09–1.56 |
| Interpersonal relationships   |                        |     | 2 $\pm$ 1   | .05                             | -.02                      | -.09 **                           | .04                                     | .98                        | .84–1.14  | 1.00                     | .83–1.20  |
| Self-Harm                     |                        |     | 1 $\pm$ 1   | .05                             | .07 *                     | -.05                              | .07 *                                   | 1.15*                      | 1.02–1.29 | 1.13                     | .98–1.29  |
| Emotional Lability            |                        |     | 2 $\pm$ 1   | .12 ***                         | .05                       | -.04                              | .04                                     | 1.01                       | .88–1.15  | 1.04                     | .89–1.22  |
| Psychosis                     |                        |     | 1 $\pm$ 1   | .09 **                          | .03                       | .02                               | .01                                     | .96                        | .84–1.10  | 1.07                     | .92–1.25  |
| Substance Abuse               |                        |     | 1 $\pm$ 1   | .07 *                           | .01                       | -.08 *                            | -.01                                    | 1.12                       | .97–1.29  | 1.06                     | .89–1.25  |
| Summary Score                 |                        |     | 2 $\pm$ 1   | .12 ***                         | .09 **                    | -.08 *                            | .10 **                                  | 1.26*                      | 1.03–1.56 | 1.32                     | 1.03–1.68 |
| <b>Perceived Health</b>       |                        |     |             |                                 |                           |                                   |                                         |                            |           |                          |           |
| <b>SF–12</b>                  |                        |     |             |                                 |                           |                                   |                                         |                            |           |                          |           |
| Perceived Mental Health       |                        |     | 31 $\pm$ 14 | -.01                            | -.08 *                    | .04                               | -.06                                    | .99                        | .98–1.00  | .99                      | .97–1.00  |
| Perceived Physical Health     |                        |     | 47 $\pm$ 13 | -.13 ***                        | -.07 *                    | -.04                              | -.10 **                                 | .98*                       | .97–1.00  | .98*                     | .97–1.00  |

\* = significant  $\leq$  .05 level; \*\* = significant  $\leq$  .01 level, \*\*\* = significant  $\leq$  .001 level. <sup>1</sup> = Reference category precontemplation. Menthol cigarette use, employment status, and income level did not have any significant associations and are not shown. For the BASIS–24, higher scores indicate a greater number of symptoms. For the SF–12, higher scores indicate better perceived health. To prevent the interference of collinearity between scales measuring overlapping constructs, each symptom or subjective health scale was tested individually, with demographic variables included.
